# Supplementary material for: Hydrolysis of p-nitrophenyl perfluoroctanoate in mixed surfactant systems
Source: Royal Society of Chemistry journal article supplement (doi:10.1039/c4ra02888k), 2014-01-01
Supplement: c4ra02888k1.pdf [file c4ra02888k1.pdf]

SUPPLEMENTARY INFORMATION

## Hydrolysis of *p*-nitrophenyl perfluorooctanoate in mixed surfactant systems

María Florencia Torres, Rita Hoyos de Rossi and Mariana A. Fernández\*

Instituto de Investigaciones en Físico-Química de Córdoba (INFIQC-CONICET), Facultad de Ciencias Químicas, Departamento de Química Orgánica, Universidad Nacional de Córdoba, Haya de la Torre y Medina Allende, Ciudad Universitaria, Córdoba, X5000HUA, Argentina.

E-mail: marfer@fcq.unc.edu.ar

**Table S1:** CMC values of the mixed surfactant systems at different compositions

| $\alpha_{\text{PFNA}}$ | Brij-35/PFNA <sup>a</sup>          |                                    | SDS/PFNA <sup>b</sup> |
|------------------------|------------------------------------|------------------------------------|-----------------------|
|                        | CMC <sub>1</sub> , mM <sup>c</sup> | CMC <sub>2</sub> , mM <sup>d</sup> | CMC, mM <sup>e</sup>  |
| 0.00                   | 0.09                               |                                    | 8.25                  |
| 0.10                   | 0.09                               | 0.59                               | 9.62                  |
| 0.20                   | 0.11                               | 0.57                               | 8.26                  |
| 0.30                   | 0.10                               | 0.63                               | 8.63                  |
| 0.40                   | 0.13                               | 0.78                               | 6.06                  |
| 0.50                   | 0.16                               | 0.74                               | 5.53                  |
| 0.60                   | 0.17                               | 0.81                               | 5.06                  |
| 0.70                   | 0.24                               | 1.00                               | 4.03                  |
| 0.80                   |                                    |                                    | 3.65                  |
| 0.90                   | 0.61                               | 1.16                               | 3.10                  |
| 1.00                   |                                    | 2.11 <sup>d</sup>                  |                       |

<sup>a</sup> From Torres, M. F.; Sales, P. S.; De Rossi, R. H.; Fernández, M. A. *Langmuir* 2010, **26**, 17858–17866.

<sup>b</sup> From Torres, M. F.; De Rossi, R. H.; Fernández, M. A. *J. Surfactants Deterg.* 2013, **16**, 903-912 .

<sup>c</sup> Values determined by fluorescence using pyrene as molecular probe.

<sup>d</sup> Values determined by UV-visible spectroscopy using *N*-(4-nitrophenyl) perfluorononamide as molecular probe.

<sup>e</sup> Values determined by conductivity.

**Table S2:** Surfactant dependence of ( $I_1/I_3$ ) values of pyrene fluorescence<sup>a</sup>

| $\alpha_{\text{PFNA}}$ | Brij-35/PFNA <sup>b</sup> | SDS/PFNA <sup>c</sup> |
|------------------------|---------------------------|-----------------------|
| 0.00                   | 1.08                      | 0.83                  |
| 0.10                   | 1.08                      | 0.82                  |
| 0.20                   | 1.08                      | 0.80                  |
| 0.30                   | 1.27                      | 0.82                  |
| 0.40                   | 1.25                      | 0.88                  |
| 0.50                   | 1.26                      | 1.00                  |
| 0.60                   | 1.26                      | 1.01                  |
| 0.70                   | 1.28                      | 1.00                  |
| 0.90                   | 1.31                      | -----                 |
| 1.00                   | 0.97                      | 0.97                  |

<sup>a</sup> [Pyrene]=  $1 \times 10^{-6}$  M

<sup>b</sup> [S]<sub>total</sub> higher than the corresponding CMC<sub>2</sub>.

<sup>c</sup> [S]<sub>total</sub> higher than the corresponding CMC.
